# Supplementary material
Source: PubMed Central journal article supplement (PMC5546156)
Supplement: NIHMS834739-supplement-JMM_27_01_015031_suppdata_pdf.pdf [file NIHMS834739-supplement-JMM_27_01_015031_suppdata_pdf.pdf]

## Supplementary Information

### **Acoustofluidic bacteria separation**

**Sixing Li,<sup>1</sup> Fen Ma,<sup>2</sup> Hunter Bachman,<sup>4</sup> Craig E. Cameron,<sup>3</sup> Xiangqun Zeng,<sup>\*2</sup> and Tony Jun Huang<sup>\*1,4</sup>**

<sup>1</sup> The Molecular, Cellular and Integrative Biosciences (MCIBS) Graduate Program, The Huck Institutes of the Life Sciences, The Pennsylvania State University, University Park, PA 16802, USA

<sup>2</sup> Department of Chemistry, Oakland University, Rochester, MI 48309, USA. E-mail: zeng@oakland.edu

<sup>3</sup> Department of Biochemistry and Molecular Biology, The Pennsylvania State University, University Park, PA 16802, USA

<sup>4</sup> Department of Mechanical Engineering and Materials Science, Duke University, Durham, NC 27708, USA. E-mail: tony.huang@duke.edu

### **Video captions**

**Supplementary Video S1:** Bright-field video taken at the outlet region of the bacterial separation experiment when the taSSAW was not applied. RBCs exited the microchannel through the lower outlet.

**Supplementary Video S2:** Fluorescence video taken at the outlet region of the bacterial separation experiment when the taSSAW was not applied. *E. coli* also exited the microchannel through the lower outlet mixed with RBCs.

**Supplementary Video S3:** Bright-field video taken at the outlet region of the bacterial separation experiment when the taSSAW was applied. Most of the RBCs were pushed to the upper outlet.

**Supplementary Video S4:** Fluorescence video taken at the outlet region of the bacterial separation experiment when the taSSAW was applied. Most of the *E. coli* remained in the lower outlet and were separated from the RBCs.
